# Supplementary material for: A statistical assessment of population trends for data deficient Mexican amphibians
Source: PeerJ. 2014 Dec 16;2:e703. doi: 10.7717/peerj.703 (PMC4273930; doi:10.7717/peerj.703)
Supplement: Table S1 [file peerj-02-703-s001.xlsx]

## Sheet: Hoja1
Supplemental Table 1: Mexican amphibian species and intrinsic and extrinsic traits used to assess the risk status for each species.
Taxon	IUCN Status	Snout-Vent Length	Habitat Use	Ova size (median in mm)	Development Type	Clutch Size	Habitat Loss/Degradation	Introduced Species	Pollution	Chitridiomycosis	Climatic Fluctuations	Pet Trade	Dessication of Habitat	Population trend	Other Diseases
Acris crepitans	LC	1	2	1.53	2	2	0	1	1	0	1	1	0	1	0
Agalychnis callidryas	LC	1	2		2		1	0	0	0	0	0	0	0	0
Agalychnis moreletii	CR	1	1		2		1	0	0	1	0	1	0	0	0
Ambystoma amblycephalum	CR	2	2		2		1	1	0	0	0	0	1	0	0
Ambystoma andersoni	CR	3	2				0	1	1	0	0	1	0	0	0
Ambystoma bombypellum	CR	2	3		2		1	1	1	0	0	0	1	0	0
Ambystoma dumerilii	CR	3	2		3		0	1	0	0	0	1	1	0	0
Ambystoma leorae	CR	2	2		2		1	1	1	0	0	1	1	0	0
Ambystoma mexicanum	CR	2	2		3	2	0	1	1	0	0	1	1	0	1
Ambystoma ordinarium	EN	2	3		2		1	1	1	0	0	0	1	0	0
Ambystoma rosaceum	LC	2	3		2	1	1	1	0	0	0	0	0		0
Ambystoma tigrinum	LC	2	3		2	2	0	1	0	0	0	0	0	1	0
Anaxyrus boreas	NT	2	3	1.65	2	3	1	1	0	1	0	0	1	0	1
Anaxyrus cognatus	LC	2		1.18	2	3	1	0	0	0	0	0	0		0
Anaxyrus compactilis	LC	2	3		2		1	0	0	0	0	0	0		0
Anaxyrus debilis	LC	1	1		2		0	0	0	0	0	0	0	1	0
Anaxyrus kelloggi	LC	1	2				0	0	0	0	0	0	0	1	0
Anaxyrus punctatus	LC	2	1				0	0	0	0	0	0	0	1	0
Anaxyrus retiformis	LC	1	1				0	0	0	0	0	0	0	1	0
Anaxyrus woodhousii	LC	2	2	1.25	2	3	0	0	0	0	0	0	0	1	0
Aneides lugubris	LC	2	4	8.25	1	1	1	0	0	0	0	0	0	1	0
Batrachoseps major	LC	1	4		1	1	1	0	0	0	0	0	0	1	0
Bolitoglossa alberchi	LC	2	4		1	1	1	0	0	0	0	0	0	1	0
Bolitoglossa chinanteca	SE	1	4		1
Bolitoglossa engelhardti	EN	1	4		1	1	1	0	0	0	0	0	0	0	0
Bolitoglossa flavimembris	EN	1	4		1	1	1	0	0	0	0	0	0	0	0
Bolitoglossa flaviventris	EN	2	4		1	1	1	0	0	0	0	0	0	0	0
Bolitoglossa franklini	EN	1	4		1	1	1	0	0	0	0	0	0	0	0
Bolitoglossa hartwegi	NT	1	4		1	1	1	0	0	0	0	0	0	1	0
Bolitoglossa hermosa	NT	1	4		1	1	1	0	0	0	0	0	0		0
Bolitoglossa lincolni	NT	1	4		1	1	1	0	0	0	0	0	0	1	0
Bolitoglossa macrinii	NT	1	4		1	1	1	0	0	0	0	0	0	0	0
Bolitoglossa mexicana	LC	2	4		1	1	1	0	0	0	0	0	0	0	0
Bolitoglossa mulleri	VU	1	4		1	1	1	0	0	0	0	0	0	0	0
Bolitoglossa oaxacensis	DD	1	4		1	1	1	0	0	0	0	0	0		0
Bolitoglossa occidentalis	LC	1	4		1	1	1	0	0	1	0	0	0	1	0
Bolitoglossa platydactyla	NT	4	4		1	1	1	0	0	0	0	0	0	0	0
Bolitoglossa riletti	EN	1	4		1		1	0	0	0	0	0	0	0	0
Bolitoglossa rostrata	VU	1	4		1	1	1	0	0	0	0	0	0	0	0
Bolitoglossa rufescens	LC	1	4		1		1	0	0	0	0	0	0	1	0
Bolitoglossa stuarti	DD	1	4		1		0	0	0	0	0	0	0		0
Bolitoglossa veracrucis	EN	1	4		1		1	0	0	0	0	0	0	0	0
Bolitoglossa yucatana	LC	1	4		1		1	0	0	0	0	0	0	0	0
Bolitoglossa zapoteca	DD	1	4		1		1	0	0	0	0	0	0		0
Bromeliohyla bromeliacia	EN	1	1		2		1	0	1	1	0	0	0	0	0
Charadrahyla trux	CR	2	3		2		1	0	0	1	0	0	0	0	0
Chiropterotriton arboreus	CR	1	4		1		1	0	0	0	0	0	0	0	0
Chiropterotriton chiropterus	CR	1	4		1		1	0	0	0	0	0	0	0	0
Chiropterotriton chondrostega	EN	1	4		1		1	0	0	0	0	0	0	0	0
Chiropterotriton cracens	EN	1	4	1.75	1		0	0	0	0	1	0	0	0	0
Chiropterotriton dimidiatus	EN	1	4	1.4	1		1	0	0	0	0	0	0	0	0
Chiropterotriton lavae	CR	1	4		1		1	0	0	0	0	0	0		0
Chiropterotriton magnipes	CR	1	4		1		1	0	0	0	0	0	1	0	0
Chiropterotriton mosaueri	DD	1	4		1		1	0	0	0	0	0	1		0
Chiropterotriton multidentatus	EN	1	4		1		1	0	0	1	1	0	0	0	0
Chiropterotriton orculus	VU		4		1		1	0	0	0	0	0	0	0	0
Chiropterotriton priscus	NT	1	4	1.2	1	1	0	0	0	0	0	0	0	1	0
Chiropterotriton terrestris	CR	1	4		1		1	0	0	0	0	0	0		0
Craugastor alfredii	VU	1	4		1		1	0	0	0	0	0	0	0	0
Craugastor amniscola	DD	1	4		1		1	0	1	0	0	0	0		0
Craugastor augusti	LC	2	4		2	1	0	0	0	0	0	0	0	1	0
Craugastor berkenbuschii	NT	1	3		2		1	0	0	1	0	0	0	0	0
Craugastor brocchi	VU	2	4		1		1	0	0	0	0	0	0	0	0
Craugastor decoratus	VU	1	4		1		1	0	0	0	0	0	0		0
Craugastor glaucus	CR	1	4		1		1	0	0	0	0	0	0	0	0
Craugastor greggi	CR	1	4		1		1	0	0	1	0	0	0	0	0
Craugastor guerreroensis	CR	1	4		1		1	0	0	1	0	0	0	0	0
Craugastor hobartsmithi	EN	1	4		1		1	0	0	0	0	0	0	0	0
Craugastor laticeps	NT	2	4		1		1	0	0	1	0	0	0		0
Craugastor lineatus	CR	1	4		1		1	0	0	1	0	0	0	0	0
Craugastor loki	LC		4		1		1	0	0	0	0	0	0	1	0
Craugastor matudai	VU	1	4		1		0	0	0	0	0	0	0	1	0
Craugastor megalotympanum	CR		4		1		1	0	0	0	0	0	0	0	0
Craugastor mexicanus	LC	1	4		1		1	0	0	1	0	0	0	0	0
Craugastor montanus	EN	1	4		1		1	0	0	0	0	0	0	0	0
Craugastor occidentalis	DD		4		1		0	0	0	0	0	0	0		0
Craugastor omiltemanus	EN	1	4		1		1	0	0	0	0	0	0	0	0
Craugastor pelorus	DD	1	4		1		1	0	0	0	0	0	0		0
Craugastor polymniae	CR	1	4		1		1	0	0	1	0	0	0	0	0
Craugastor pozo	CR	1	4		1		1	0	0	0	0	0	0	0	0
Craugastor pygmaeus	VU	1	4		1		1	0	0	0	0	0	0	0	0
Craugastor rhodopis	VU	1	4		1		1	0	0	0	0	0	0	0	0
Craugastor rugulosus	LC	1	4		1		1	0	0	0	0	0	1	1	0
Craugastor rupinius	LC	1	4		1		1	0	0	0	0	0	0	1	0
Craugastor silvicola	EN	1	4		1		1	0	0	0	0	0	0	0	0
Craugastor spatulatus	EN	1	4		1		1	0	0	0	0	0	0	0	0
Craugastor stuarti	EN	1	4		1		1	0	0	0	0	0	0	0	0
Craugastor tarahumaraensis	VU	1	4		1		1	0	0	0	0	0	0	0	0
Craugastor taylori	DD	1	4		1		0	0	0	0	0	0	0		0
Craugastor uno	EN	1	4		1		1	0	0	0	0	0	0	0	0
Craugastor vocalis	LC	1	4		1		1	0	0	0	0	0	0	0	0
Craugastor vulcani	EN	1	4		1		1	0	0	0	0	0	0	0	0
Craugastor yucatanensis	NT	1	4		1		1	0	0	0	0	0	0		0
Cryptotriton adelos	EN	1	4		1		1	0	0	0	0	0	0	0	0
Cryptotriton alvarezdeltoroi	EN	1	4		1		1	0	0	0	0	0	0	0	0
Dendropsophus ebraccatus	LC	1	1	1.3	2		1	0	1	0	0	0	0	1	0
Dendropsophus microcephalus	LC	1	1		2		0	0	0	0	0	0	0	1	0
Dendropsophus sartori	LC	1	1				1	0	0	0	0	0	0	1	0
Dendrotriton megarhinus	VU	1	4		1		0	0	0	0	1	0	0	1	0
Dendrotriton xolocalcae	VU	1	4		1		1	0	0	0	0	0	0	1	0
Dermophis mexicanus	VU	4	4		1	1	1	0	0	0	0	1	0	0	0
Dermophis oaxacae	DD	4	4		1
Diaglena spatulata	LC	2	1		2		0	0	0	0	1	0	0		0
Duellmanohyla chamulae	EN	1	3		2		1	0	0	1	0	0	0	0	0
Duellmanohyla ignicolor	EN	1	2		2		1	0	0	1	0	0	0	0	0
Ecnomiohyla echinata	CR	1	2		2		1	0	0	1	0	0	0	0	0
Ecnomiohyla miotympanum	NT	1	2		2		1	0	0	0	0	1	0	0	0
Ecnomiohyla valancifer	CR	2	2		2		1	0	0	0	0	0	0	0	0
Eleutherodactylus angustidigitorum	VU	1	4		1		1	0	0	0	0	0	0	0	0
Eleutherodactylus cystignathoides	LC	1	4		1		0	0	0	0	0	0	0	1	0
Eleutherodactylus dennisi	EN	1	4		1		1	0	0	0	0	0	0		0
Eleutherodactylus dilatus	EN	1	4		1		1	0	0	0	0	0	0	0	0
Eleutherodactylus dixoni /Eleuthrodactylus albolabris	CR	1	4		1		1	0	0	0	0	0	0	0	0
Eleutherodactylus grandis	CR	1	4		1		1	0	0	0	0	0	0	0	0
Eleutherodactylus guttilatus	LC	1	4		1	1	1	0	0	0	0	0	0		0
Eleutherodactylus interorbitalis	DD	1	4		1		1	0	0	0	0	0	0		0
Eleutherodactylus leprus	VU	1	4		1		1	0	0	0	0	0	0	0	0
Eleutherodactylus longipes	VU	1	4		1		1	0	0	1	0	0	0	0	0
Eleutherodactylus marnockii	LC	1	4		1									1
Eleutherodactylus maurus	DD	1	4		1		1	0	0	0	0	0	0		0
Eleutherodactylus modestus	VU	1	4		1		1	0	0	0	0	0	0	0	0
Eleutherodactylus nitidus	LC	1	4		1		1	0	0	0	0	0	0	0	0
Eleutherodactylus nivicolimae	VU	1	4		1		1	0	0	0	0	0	0	1	0
Eleutherodactylus pallidus	DD	1	4		1		1	0	0	0	0	0	0		0
Eleutherodactylus pipilans	LC	1	4		1		1	0	0	0	0	0	0	1	0
Eleutherodactylus planirostris	introduced	1	4		1	1	0	0	0	0	0	0	0	1	0
Eleutherodactylus rubrimaculatus	VU	1	4		1		1	0	0	0	0	0	0	1	0
Eleutherodactylus rufescens	CR	1	4		1		1	0	0	0	0	0	0	0	0
Eleutherodactylus saxatilis	EN	1	4		1		1	0	0	0	0	0	0	0	0
Eleutherodactylus syristes	EN	1	4		1		1	0	0	0	0	0	0	0	0
Eleutherodactylus teretistes	DD	1	4		1		1	0	0	0	0	0	0		0
Eleutherodactylus verrucipes	VU	1	4		1		1	0	0	0	0	0	0	1	0
Eleutherodactylus verruculatus	DD	1	4		1
Engystomops pustulosus	LC	1	3	1.4	2		1	0	0	0	0	0	0	1	0
Ensatina eschscholtzii	LC	2	4		1		1	0	0	0	0	0	0	0	0
Exerodonta abdivita	DD	1	2		2		1	0	0	0	0	0	0		0
Exerodonta bivocata	DD	1	3		2		1	0	0	0	0	0	0		0
Exerodonta chimalapa	EN	1	2		2		1	0	0	0	0	0	1	0	0
Exerodonta juanitae	VU	1	1		2		1	0	0	1	0	0	0	0	0
Exerodonta melanomma	VU	1	3		2		1	0	0	1	0	0	0	0	0
Exerodonta smaragdina	LC	1	3		2		1	0	0	0	0	0	0	1	0
Exerodonta sumichrasti	LC	1	2	1.61	2		1	0	0	0	0	0	0	0	0
Exerodonta xera	VU	1	2		2		1	0	0	0	0	0	0	1	0
Gastrophryne elegans	LC	1	1		2		1	0	0	0	0	0	0	1	0
Gastrophryne olivacea	LC	1	1		2		0	0	0	0	1	0	0	1	0
Hyalinobatrachium fleischmanni	LC	1	2		2	1	1	0	1	1	0	0	0		0
Hyla arenicolor	LC	1	3		2		0	0	0	0	0	0	0	1	0
Hyla euphorbiacea	NT	1	1		2		1	0	0	0	0	0	0	0	0
Hyla eximia	LC	1	2		2		0	0	0	0	0	0	0	1	0
Hyla plicata	LC	1	3		2		1	0	0	0	0	0	0	1	0
Hyla wrightorum	LC	1	2		2		0	0	0	0	0	0	0	1	0
Hypopachus variolosus	LC	1	1		2	2	0	0	0	0	0	0	0	1	0
Incilius alvarius	LC	4	2		2	3	0	0	0	0	0	0	0	1	0
Incilius canaliferus	LC	1	3		2		1	0	1	0	0	0	0	1	0
Incilius cavifrons	EN	2	2		2		1	0	0	0	0	0	0	0	0
Incilius coccifer	LC	2	3		2		0	0	0	0	0	0	0	1	0
Incilius cristatus	CR	2	2		2		1	0	1	0	0	0	0	0	0
Incilius gemmifer	EN		2		2		1	0	0	0	0	0	0	0	0
Incilius luetkenii	LC	2	1		2		0	0	0	0	0	0	0	0	0
Incilius marmoreus	LC	2	3		2		1	0	0	0	0	0	0	1	0
Incilius mazatlanensis	LC	2	3		2		1	0	0	0	0	0	1	1	0
Incilius perplexus	EN	1	1		2		1	0	0	0	0	0	0	0	0
Incilius tutelarius	EN	2	2		2		1	0	0	1	0	0	0	0	0
Incilius valliceps	LC	2	2	1.21	2		0	0	0	0	0	0	0	1	0
Leptodactylus fragilis	LC	1	1		2	2	0	0	1	0	0	0	0	1	0
Leptodactylus melanonotus	LC	1	1		2		0	0	1	0	0	0	0	1	0
Lithobates berlandieri	LC	2	2		2		0	0	0	0	0	0	0	1	0
Lithobates catesbeianus	LC	3	2	1.3	2	3	0	0	0	0	0	0	0	1	0
Lithobates chiricahuensis	VU	2	2		2		1	1	0	1	0	0	1	0	0
Lithobates dunni	EN	2	3		2		0	0	0	0	0	1	0	0	0
Lithobates forreri	LC	2	3		2		0	0	0	0	0	0	0	1	0
Lithobates lemosespinali	DD		2		2		1	0	0	0	0	0	0		0
Lithobates magnaocularis	LC		3		2		0	0	0	0	1	0	0		0
Lithobates megapoda	VU	3	3		2		1	0	1	0	0	1	0	0	0
Lithobates omiltemanus	CR	1	2		2		1	0	0	1	0	0	1	0	0
Lithobates pustulosus	LC	2	3		2		0	0	0	0	0	0	0	1	0
Lithobates sierramadrensis	VU	2	3		2		1	0	0	1	0	0	0	0	0
Lithobates tarahumarae	VU	2	2		2		0	1	0	1	1	0	0	0	0
Lithobates tlaloci	CR	1	3		2		1	0	0	0	0	0	0	0	0
Lithobates vaillanti	LC	2	2		2		0	1	1	0	0	0	0	1	0
Lithobates yavapaiensis	LC	2	2		2		1	1	1	1	1	0	1	0	1
Megastomatohyla mixomaculata	EN	1	1		2		1	0	0	0	0	0	0	0	0
Notophthalmus meridionalis	EN	1	2		2		1	0	1	0	0	0	0	0	0
Nyctanolis pernix	EN	2	4		1		1	0	0	0	0	0	0	0	0
Oedipina elongata	LC	1	4		1		1	0	0	0	0	0	0	0	0
Pachymedusa dacnicolor	LC	2	1		2	2	1	0	0	0	0	0	0	1	0
Parvimolge townsendi	CR	1	4		1		1	0	0	0	0	0	0	0	0
Plectrohhyla pachyderma	CR	1	3		2		1	0	0	1	0	0	1	0	0
Plectrohyla arborescandens	EN	1	2	2.152	2		1	0	0	1	0	0	1	0	0
Plectrohyla avia	CR	2	3		2		1	0	0	1	0	0	0	0	0
Plectrohyla bistincta	LC	1	2		2		1	0	0	1	0	0	0	0	0
Plectrohyla calvicollina	CR	1	2		2		1	0	0	1	0	0	0	0	0
Plectrohyla celata	CR	1	3		2		1	0	0	1	0	0	0	0	0
Plectrohyla cyanomma	CR	1	3		2		1	0	0	1	0	0	0	0	0
Plectrohyla cyclada	EN	1	2		2		1	0	0	1	0	0	0	0	0
Plectrohyla guatemalensis	CR	1	2	2	2		0	0	0	1	0	0	0	0	0
Plectrohyla hazelae	CR	1	2		2		0	0	0	1	0	0	0	0	0
Plectrohyla lacertosa	EN	1	2		2		1	0	0	1	0	0	0	0	0
Plectrohyla matudai	VU	1	2		2		1	0	0	1	0	0	0	0	0
Plectrohyla mykter	EN	1	2		2		1	0	0	1	0	0	0	0	0
Plectrohyla pentheter	EN	1	2		2		1	0	0	1	0	0	0	0	0
Plectrohyla psarosema	CR	1	2		2		1	0	0	1	0	0	0	0	0
Plectrohyla pycnochila	CR	1	2		2		1	0	0	1	0	0	0	0	0
Plectrohyla sabrina	CR	1	2		2		1	0	0	1	0	0	0	0	0
Plectrohyla sagorum	EN	1	2	1.7	2		1	0	0	1	0	0	0		0
Plectrohyla siopela	CR	1	3		2		1	0	0	1	0	0	1	0	0
Plectrohyla thorectes	CR	1	2		2		1	0	0	1	0	0	0	0	0
Pseudacris cadaverina	LC	1	2		2		1	0	0	0	0	0	0	1	0
Pseudacris clarkii	LC	1	1		2	2	1	0	0	0	0	0	0	1	0
Pseudacris regilla	LC	1	2		2	1	0	1	0	0	0	1	0	1	0
Pseudoeurycea ahuitzotl	CR	1	4		1		1	0	0	0	0	0	0	0	0
Pseudoeurycea altamontana	EN	1	4		1		1	0	0	0	0	0	0	0	0
Pseudoeurycea amuzga	DD	1	4		1		1	0	0	0	0	0	0		0
Pseudoeurycea anitae	CR	1	4		1		1	0	0	0	0	0	0		0
Pseudoeurycea aquatica	CR	2	2		1		1	0	0	0	0	0	0	0	0
Pseudoeurycea aurantia	VU	1	4	4.7	1	1	1	0	0	0	0	0	0		0
Pseudoeurycea bellii	VU	2	4		1	1	1	0	0	0	0	0	0	0	0
Pseudoeurycea boneti	VU	1	4		1		1	0	0	0	0	0	0	0	0
Pseudoeurycea brunnata	CR	1	4		1		1	0	0	0	0	0	0	0	0
Pseudoeurycea cephalica	NT	1	4		1		1	0	0	0	0	0	0	0	0
Pseudoeurycea cochranae	EN	1	4		1		1	0	0	0	0	0	0	0	0
Pseudoeurycea conanti	EN	1	4		1		1	0	0	0	0	0	0	0	0
Pseudoeurycea firscheini	EN	1	4		1		1	0	0	0	0	0	0	0	0
Pseudoeurycea gadovii	EN	2	4		1		1	0	0	0	0	0	0	0	0
Pseudoeurycea galeanae	NT	1	4		1		1	0	0	0	0	0	0		0
Pseudoeurycea gigantea	CR	2	4		1		1	1	0	0	0	0	0	0	0
Pseudoeurycea goebeli	CR		4		1		1	0	0	0	0	0	0	0	0
Pseudoeurycea juarezi	CR	1	4		1		1	0	0	0	0	0	0	0	0
Pseudoeurycea leprosa	VU	1	4		1		1	0	0	0	0	0	0	0	0
Pseudoeurycea lineola	EN		4		1		1	0	0	0	0	0	0	0	0
Pseudoeurycea longicauda	EN	1	4		1		1	0	0	0	0	0	0	0	0
Pseudoeurycea lynchi	CR	1	4		1		1	1	0	0	0	0	0	0	0
Pseudoeurycea maxima	DD	2	4		1		1	0	0	0	0	0	0		0
Pseudoeurycea melanomolga	EN	1	4		1		1	0	0	0	0	0	0	0	0
Pseudoeurycea mixcoatl	DD	1	4		1		1	0	0	0	0	0	0	0	0
Pseudoeurycea mixteca	LC	1	4		1		1	0	0	0	0	0	0	1	0
Pseudoeurycea mystax	EN	1	4		1		1	0	0	0	0	0	0	0	0
Pseudoeurycea naucampatepetl	CR	2	4		1		1	0	0	0	0	0	0	0	0
Pseudoeurycea nigra	CR	1	4		1		1	0	0	0	0	0	0	0	0
Pseudoeurycea nigromaculata	CR	1	4	1.8	1		1	0	0	0	0	0	0	0	0
Pseudoeurycea obesa	DD	1	4		1		1	0	0	0	0	0	0		0
Pseudoeurycea orchileucos	EN	1	4		1		1	0	0	0	0	0	0	0	0
Pseudoeurycea orchimelas	EN	1	4		1		1	0	0	0	0	0	0	0	0
Pseudoeurycea papenfussi	NT	2	4		1		1	0	0	0	0	0	0		0
Pseudoeurycea parva	CR	1	4		1		1	0	0	0	0	0	0	0	0
Pseudoeurycea praecellens	CR	1	4		1		1	0	0	0	0	0	0	0	0
Pseudoeurycea quetzalanensis	DD	1	4		1		1	0	0	0	0	0	0		0
Pseudoeurycea rex	CR	1	4		1		1	0	0	0	0	0	0	0	0
Pseudoeurycea saltator	CR	1	4		1		1	0	0	0	0	0	0	0	0
Pseudoeurycea scandens	vu	1	4	3.5	1		0	0	0	0	0	0	0		0
Pseudoeurycea smithi	CR	2	4		1		1	0	0	0	0	0	0	0	0
Pseudoeurycea tenchalli	EN	1	4		1		1	0	0	0	0	0	0	0	0
Pseudoeurycea teotepec	EN	1	4		1		1	0	0	0	0	0	0	0	0
Pseudoeurycea tlahcuiloh	CR	1	4		1		1	0	0	0	0	0	0	0	0
Pseudoeurycea tlilicxitl	DD	1	4		1		0	0	0	0	0	0	0		0
Pseudoeurycea unguidentis	CR	1	4		1		1	0	0	1	1	0	0	0	0
Pseudoeurycea werleri	EN	1	4		1		1	0	0	0	0	0	0	0	0
Ptychohyla acrochorda	DD	1	2		2		1	0	0	1	0	0	0		0
Ptychohyla euthysanota	NT	1	2		1		1	0	0	1	0	0	0		0
Ptychohyla leonhardschultzei	EN	1	3		2		1	0	0	1	0	0	0	0	0
Ptychohyla zophodes	DD	1	2		2		1	0	0	1	0	0	0		0
Rana boylii	NT	1	2	2.12	2	2	1	1	0	0	0	0	1	0	0
Rana draytonii	VU		2		2	3	1	1	1	0	1	0	1	0	0
Rhinella marina	LC	4	2		2	3	0	0	0	0	0	0	0	1	0
Rhinophrynus dorsalis	LC	1	1		2		0	0	0	0	0	0	0	1	0
Scaphiopus couchii	LC		1	1.45	2	2	0	0	0	0	0	0	0	1	0
Scaphiopus hurterii	LC	1	1		2	3	1	0	1	0	0	0	0	1	0
Siren intermedia	LC	3	2		Paedomoorphic	2	1	0	0	0	0	0	1		0
Siren lacertina	LC	4	3		3	2	1	0	0	0	0	0	1		0
Smilisca baudinii	LC	1	3	1.3	2	2	1	0	0	0	0	0	0	1	0
Smilisca fodiens	LC	1	1		2		1	0	0	0	0	0	0	1	0
Spea bombifrons	LC	1	1	1.2	2	3	1	0	0	0	1	0	0	1	0
Spea hammondii	NT	1	1	1.3	2	2	1	1	0	0	0	0	0	0	0
Spea multiplicata	LC	1	1	1.34	2	2	1	0	0	0	0	0	0	1	0
Thorius arboreus	EN	1	4		1		1	0	0	0	0	0	0	0	0
Thorius aureus	CR	1	4		1		1	0	0	0	0	0	0	0
Thorius boreas	EN	1	4		1		1	0	0	0	0	0	0	0	0
Thorius dubitus	EN	1	4		1		1	0	0	0	0	0	0	0	0
Thorius grandis	EN	1	4		1		1	0	0	0	0	0	0	0	0
Thorius infernalis	CR	1	4		1		1	0	0	0	0	0	0	0	0
Thorius insperatus	DD	1	4		1		1	0	0	0	0	0	0		0
Thorius lunaris	EN	1	4		1		1	0	0	0	0	0	0	0	0
Thorius macdougalli	VU	1	4		1		1	0	0	0	0	0	0	1	0
Thorius magnipes	CR	1	4		1		1	0	0	0	0	0	0	0	0
Thorius minutissimus	CR	1	4		1		1	0	0	0	0	0	0	0	0
Thorius minydemus	CR	1	4		1		1	0	0	0	0	0	0		0
Thorius munificus	CR	1	4		1		1	0	0	0	0	0	0		0
Thorius narismagnus	CR	1	4		1		1	0	0	0	0	0	0	0	0
Thorius narisovalis	CR	1	4		1		1	0	0	0	0	0	0	0	0
Thorius omiltemi	EN	1	4		1		1	0	0	0	0	0	0	0	0
Thorius papaloae	EN	1	4		1		1	0	0	0	0	0	0	0	0
Thorius pennatulus	CR	1	4		1		1	0	0	0	0	0	0	0	0
Thorius pulmonaris	EN	1	4		1		1	0	0	0	0	0	0	0	0
Thorius schmidti	EN	1	4		1		1	0	0	0	0	0	0	0	0
Thorius smithi	CR	1	4		1		1	0	0	0	0	0	0		0
Thorius spilogaster	CR	1	4		1		1	0	0	0	0	0	0	0	0
Thorius troglodytes	EN	1	4		1		1	0	0	0	0	0	0	0	0
Tlalocohyla godmani	VU	1	1		2		1	0	1	0	0	0	0		0
Tlalocohyla loquax	LC	1	3		2		1	0	0	0	0	0	0	1	0
Tlalocohyla smithii	LC	1	1		2		1	0	0	0	0	0	0	0	0
Trachycephalus venulosus	LC	2	1		2		0	0	0	0	0	0	0	1	0
Triprion petasatus	LC	1	3		2		0	0	0	0	0	0	0	1	0
