# Supplementary material for: A statistical assessment of population trends for data deficient Mexican amphibians
Source: PeerJ. 2014 Dec 16;2:e703. doi: 10.7717/peerj.703 (PMC4273930; doi:10.7717/peerj.703)
Supplement: Table S2 [file peerj-02-703-s002.xlsx]

## Sheet: Hoja1
Supplemental Table 2: Data obtained from the literature
Taxon	Total length	Snout-Vent Length	Habitat Use	Development Type
Acris crepitans
Agalychnis callidryas
Agalychnis moreletii
Ambystoma amblycephalum	Taylor, E. H. 1939. New salamanders from Mexico, with a discussion of certain known forms. University of Kansas Science Bulletin 26:407-431.	Taylor, E. H. 1939. New salamanders from Mexico, with a discussion of certain known forms. University of Kansas Science Bulletin 26:407-431.
Ambystoma andersoni
Ambystoma dumerilii
Ambystoma leorae		amphibia web: http://amphibiaweb.org/
Ambystoma mexicanum
Ambystoma ordinarium
Ambystoma tigrinum
Anaxyrus boreas
Anaxyrus cognatus		Kellogg, R. 1932. Mexican tailless amphibians in the United States National Museum. Bulletin of the United States National Museum 160:1-224.
Anaxyrus kelloggi		Taylor, E. H. 1938 "1936". Notes on the herpetological fauna of the Mexican state of Sinaloa. University of Kansas Science Bulletin 24: 505–537	Taylor, E. H. 1938 "1936". Notes on the herpetological fauna of the Mexican state of Sinaloa. University of Kansas Science Bulletin 24: 505–537
Anaxyrus punctatus		Kellogg, R. 1932. Mexican tailless amphibians in the United States National Museum. Bulletin of the United States National Museum 160:1-224.	Kellogg, R. 1932. Mexican tailless amphibians in the United States National Museum. Bulletin of the United States National Museum 160:1-224.
Anaxyrus retiformis
Anaxyrus woodhouseii		Kellogg, R. 1932. Mexican tailless amphibians in the United States National Museum. Bulletin of the United States National Museum 160:1-224.
Aneides lugubris		amphibia web: http://amphibiaweb.org/: Lynch, J. F., and Wake, D. B. (1974). ''Aneides lugubris (Hallowell). Arboreal Salamander.'' Catalogue of American Amphibians and Reptiles. Society for the Study of Amphibians and Reptiles, 159.1-159.2		amphibia web: http://amphibiaweb.org/
Batrachoseps major
Bolitoglossa alberchi
Bolitoglossa chinanteca
Bolitoglossa engelhardti	Schmidt, K. P. 1936. Guatemalan salamanders of the genus Oedipus. Zoological Series of Field Museum of Natural History 20:135-166.
Bolitoglossa flavimembris	Schmidt, K. P. 1936. Guatemalan salamanders of the genus Oedipus. Zoological Series of Field Museum of Natural History 20:135-166.	Schmidt, K. P. 1936. Guatemalan salamanders of the genus Oedipus. Zoological Series of Field Museum of Natural History 20:135-166.
Bolitoglossa flaviventris	Schmidt, K. P. 1936. Guatemalan salamanders of the genus Oedipus. Zoological Series of Field Museum of Natural History 20:135-166.	Schmidt, K. P. 1936. Guatemalan salamanders of the genus Oedipus. Zoological Series of Field Museum of Natural History 20:135-166.
Bolitoglossa franklini	Schmidt, K. P. 1936. Guatemalan salamanders of the genus Oedipus. Zoological Series of Field Museum of Natural History 20:135-166. Taylor, E. H. 1941; New amphibians from the Hobart M. Smith Mexican collections. The University of Kansas Science bulletin. 27:141-167.	Taylor, E. H. 1941. New amphibians from the Hobart M. Smith Mexican collections. The University of Kansas Science bulletin. 27:141-167.	Taylor, E. H. 1941. New amphibians from the Hobart M. Smith Mexican collections. The University of Kansas Science bulletin. 27:141-167.
Bolitoglossa hartwegi		Wake, D., and A. H. Brame, Jr. 1969. Systematics and Evolution of Neotropical Salamanders of the Bolitoglossa helmrichi group. Contrubutions in Science. Los Angeles County Museum 175:1-40.
Bolitoglossa hermosa		Papenfuss, T. J., D. B. Wake, y K. Adler. 1983. Salamanders of the Genus Bolitoglossa from the Sierra Madre del Sur of Southern Mexico. Journal of Herpetology 17:295-307.
Bolitoglossa lincolni	Stuart, L.C. 1943. Taxonomic and Geographic comments on Guatemalan salamanders of the genus Oedipus. Miscellaneous Publications. Museum of Zoology, University of Michigan 56:1-33.	Stuart, L.C. 1943. Taxonomic and Geographic comments on Guatemalan salamanders of the genus Oedipus. Miscellaneous Publications. Museum of Zoology, University of Michigan 56:1-33.	Stuart, L.C. 1943. Taxonomic and Geographic comments on Guatemalan salamanders of the genus Oedipus. Miscellaneous Publications. Museum of Zoology, University of Michigan 56:1-33.
Bolitoglossa macrinii		Papenfuss, T. J., D. B. Wake, y K. Adler. 1983. Salamanders of the Genus Bolitoglossa from the Sierra Madre del Sur of Southern Mexico. Journal of Herpetology 17:295-307. Taylor, E. H. 1949. New or unusual Mexican amphibians. American Museum Novitates 1437:1-21.
Bolitoglossa mexicana		amphibia web: http://amphibiaweb.org/: Raffaelli
Bolitoglossa mulleri	Stuart, L.C. 1943. Taxonomic and Geographic comments on Guatemalan salamanders of the genus Oedipus. Miscellaneous Publications. Museum of Zoology, University of Michigan 56:1-33.
Bolitoglossa oaxacensis		Parra-Olea, G., M. García-París, and D. B. Wake. 2002. Phylogenetic relationships among the salamanders of the Bolitoglossa macrinii species group (Amphibia: Plethodontidae), with descriptions of two new species from Oaxaca (Mexico). Journal of Herpetology 36: 356–366	Parra-Olea, G., M. García-París, and D. B. Wake. 2002. Phylogenetic relationships among the salamanders of the Bolitoglossa macrinii species group (Amphibia: Plethodontidae), with descriptions of two new species from Oaxaca (Mexico). Journal of Herpetology 36: 356–366
Bolitoglossa occidentalis		Taylor, E. H. 1941. New amphibians from the Hobart M. Smith Mexican collections. The University of Kansas Science bulletin. 27:141-167.
Bolitoglossa platydactyla		amphibia web: http://amphibiaweb.org/
Bolitoglossa riletti		Papenfuss, T. J., D. B. Wake, y K. Adler. 1983. Salamanders of the Genus Bolitoglossa from the Sierra Madre del Sur of Southern Mexico. Journal of Herpetology 17:295-307. Taylor, E. H. 1949. New or unusual Mexican amphibians. American Museum Novitates 1437:1-21.
Bolitoglossa rostrata				amphibia web: http://amphibiaweb.org/
Bolitoglossa rufescens
Bolitoglossa stuarti		Wake, D., and A. H. Brame, Jr. 1969. Systematics and Evolution of Neotropical Salamanders of the Bolitoglossa helmrichi group. Contrubutions in Science. Los Angeles County Museum 175:1-40.
Bolitoglossa veracrucis		Taylor, E. H. 1951. A new veracrucian salamander. The University of Kansas Science Bulletin 34:189-193.
Bolitoglossa yucatana
Bolitoglossa zapoteca		Parra-Olea, G., M. García-París, and D. B. Wake. 2002. Phylogenetic relationships among the salamanders of the Bolitoglossa macrinii species group (Amphibia: Plethodontidae), with descriptions of two new species from Oaxaca (Mexico). Journal of Herpetology 36: 356–366
Bromeliohyla bromeliacia
Chiropterotriton arboreus	Taylor, E. H. 1941. New Plethodont Salamanders from Mexico. Herpetologica 2:57-65 // Rabb, G.B. 1958. On certain Mexican salamanders of the Plethodontid genus Chiropterotriton. Occasional papers of the Museum of Zoology. University of Michigan 587: 1-43	Taylor, E. H. 1941. New Plethodont Salamanders from Mexico. Herpetologica 2:57-65 // Rabb, G.B. 1958. On certain Mexican salamanders of the Plethodontid genus Chiropterotriton. Occasional papers of the Museum of Zoology. University of Michigan 587: 1-43
Chiropterotriton chiropterus
Chiropterotriton chondrostega	Taylor, E. H. 1941. Herpetological miscellany, no. II. University of Kansas Science Bulletin 27:105-139	Taylor, E. H. 1941. Herpetological miscellany, no. II. University of Kansas Science Bulletin 27:105-139 // Rabb, G.B. 1958. On certain Mexican salamanders of the Plethodontid genus Chiropterotriton. Occasional papers of the Museum of Zoology. University of Michigan 587: 1-43
Chiropterotriton cracens		Rabb, G.B. 1958. On certain Mexican salamanders of the Plethodontid genus Chiropterotriton. Occasional papers of the Museum of Zoology. University of Michigan 587: 1-43		Rabb, G.B. 1958. On certain Mexican salamanders of the Plethodontid genus Chiropterotriton. Occasional papers of the Museum of Zoology. University of Michigan 587: 1-43
Chiropterotriton dimidiatus		Taylor, E. H. 1939. New salamanders from Mexico, with a discussion of certain known forms. University of Kansas Science Bulletin 26:407-431 // Rabb, G.B. 1958. On certain Mexican salamanders of the Plethodontid genus Chiropterotriton. Occasional papers of the Museum of Zoology. University of Michigan 587: 1-43		Rabb, G.B. 1958. On certain Mexican salamanders of the Plethodontid genus Chiropterotriton. Occasional papers of the Museum of Zoology. University of Michigan 587: 1-43
Chiropterotriton lavae		Taylor, E.H. 1942. New Caudata and Salienta from mexico. University of Kansas Science Bulletin 28: 295-323.
Chiropterotriton magnipes		Raab, G. B. 1965. A New Salamander of the Genus Chiropterotriton (Caudata: Plethodontidae) from Mexico. Breviora. Museum of Comparative Zoology, Cambridge, Massachusetts 235:1-8.
Chiropterotriton mosaueri
Chiropterotriton multidentatus
Chiropterotriton orculus
Chiropterotriton priscus		Rabb, G. B. 1956. A new plethodontid salamander from Nuevo León, Mexico. Fieldiana. Zoology 39: 11–20.		Rabb, G. B. 1956. A new plethodontid salamander from Nuevo León, Mexico. Fieldiana. Zoology 39: 11–20.
Chiropterotriton terrestris		Rabb, G.B. 1958. On certain Mexican salamanders of the Plethodontid genus Chiropterotriton. Occasional papers of the Museum of Zoology. University of Michigan 587: 1-43
Craugastor guerreroensis		Lynch, J. D. 1967. Two New Species of Eleutherodactylus from Guatemala and Mexico (Amphibia:Leptodactylidae). Transactions of the Kansas Academy of Science (1903-) 70:177-183.
Craugastor alfedii		Boulenger, G.A. 1898. Fourth Report on Additions to the Batrachian Collection in the Natural-History Museum 1. Proceedings of the Zoological Society of London 1898: 473-482.
Craugastor amniscola
Craugastor augusti		Kellogg, R. 1932. Mexican tailless amphibians in the United States National Museum. Bulletin of the United States National Museum 160:1-224.	Lemos Espinal, J.A. 2007 Anfibios y reptiles del estado de Sonora. Universidad Nacional Autónoma de México. Informe final SNIB-CONABIO proyecto No. CE001 México D.F.
Craugastor brocchi
Craugastor decoratus		Taylor, E.H. 1942. New Caudata and Salienta from mexico. University of Kansas Science Bulletin 28: 295-323.
Craugastor glaucus		Lynch, J. D. 1967. Two New Species of Eleutherodactylus from Guatemala and Mexico (Amphibia:Leptodactylidae). Transactions of the Kansas Academy of Science (1903-) 70:177-183.
Craugastor greggi		Bumzahem, C. B. 1955. A New Species of Frog of the Genus Eleutherodactylus from Guatemala. Copeia 1955:118-119.
Craugastor hobartsmithi		Taylor, E.H. 1936. New Species of Amphibia from Mexico. Trasactions of the Kansas Academy of Sciences. 39:349-363
Craugastor laticeps		Kellogg, R. 1932. Mexican tailless amphibians in the United States National Museum. Bulletin of the United States National Museum 160:1-224.
Craugastor lineatus		Taylor, E. H. 1942. New Tailless Amphibia from Mexico. The University of Kansas Science Bulletin. 28:67-89.
Craugastor loki
Craugastor matudai		Taylor, E. H. 1941. New amphibians from the Hobart M. Smith Mexican collections. The University of Kansas Science bulletin. 27:141-167.
Craugastor megalotympanum
Craugastor mexicanus		Kellogg, R. 1932. Mexican tailless amphibians in the United States National Museum. Bulletin of the United States National Museum 160:1-224.	Kellogg, R. 1932. Mexican tailless amphibians in the United States National Museum. Bulletin of the United States National Museum 160:1-224.
Craugastor montanus		Taylor, E. H. 1942. New Tailless Amphibia from Mexico. The University of Kansas Science Bulletin. 28:67-89.
Craugastor occidentalis
Craugastor omiltemanus		Günther, A. C. 1900. Reptilia and Batrachia. Pages 213-220 in O. Salvin, and F. D. Godman, editors. Biologia Centrali Americana. Porter and Dulau & Co., Londres.
Craugastor pelorus
Craugastor polymniae		Campbell, J. A., W. W. Lamar, and D. M. Hillis. 1989. A New Species Of Diminutive Eleutherodactylus (Leptodactylidae) From Oaxaca, Mexico. Proceedings of The Biological Society of Washington 102:491-499.
Craugastor pozo
Craugastor pygmaeus		Taylor, E. H. 1942. New Tailless Amphibia from Mexico. The University of Kansas Science Bulletin. 28:67-89; Taylor, E.H. 1936. New Species of Amphibia from Mexico. Trasactions of the Kansas Academy of Sciences. 39:349-363
Craugastor rhodopis		Taylor, E. H. 1941. New amphibians from the Hobart M. Smith Mexican collections. The University of Kansas Science bulletin. 27:141-167.	Kellogg, R. 1932. Mexican tailless amphibians in the United States National Museum. Bulletin of the United States National Museum 160:1-224.
Craugastor rugulosus		Kellogg, R. 1932. Mexican tailless amphibians in the United States National Museum. Bulletin of the United States National Museum 160:1-224.
Craugastor rupinius
Craugastor silvicola		Lynch, J. D. 1967. Two new Eleutherodactylus from western Mexico (Amphibia; Leptodactylidae). Proceedings of The Biological Society of Washington 80:211-217.	Lynch, J. D. 1967. Two new Eleutherodactylus from western Mexico (Amphibia; Leptodactylidae). Proceedings of The Biological Society of Washington 80:211-217.
Craugastor spatulatus		Smith, H. M. 1939. Mexican herpetological novelties. Proceedings of the Biological Society of Washington 52:187-196.	Smith, H. M. 1939. Mexican herpetological novelties. Proceedings of the Biological Society of Washington 52:187-196.
Craugastor stuarti		Lynch, J. D. 1967. Two New Species of Eleutherodactylus from Guatemala and Mexico (Amphibia:Leptodactylidae). Transactions of the Kansas Academy of Science (1903-) 70:177-183.
Craugastor tarahumaraensis		Taylor, E. H. 1940. A New Frog from the Tarahumara Mountains of Mexico. Copeia 1940:250-253.
Craugastor taylori
Craugastor uno		Savage, J. M. 1984. A new species of montane rain frog, Genus Eleutherodactylus (Leptodactylus), from Guerrero, México. Amphibia-Reptilia 5:253-260.
Craugastor vocalis		Taylor, E. H. 1940 "1939". New species of Mexican Anura. University of Kansas Science Bulletin 26: 385–405
Craugastor vulcani
Craugastor yucatanensis
Cryptotriton adelos	Papenfuss, T., and D. Wake. 1987. Two new species of plethodontid salamanders (genus Nototriton) from Mexico. Acta Zoológica Mexicana (nueva serie) 21:1-16.	Papenfuss, T., and D. Wake. 1987. Two new species of plethodontid salamanders (genus Nototriton) from Mexico. Acta Zoológica Mexicana (nueva serie) 21:1-16.
Cryptotriton alvarezdeltoroi	Papenfuss, T., and D. Wake. 1987. Two new species of plethodontid salamanders (genus Nototriton) from Mexico. Acta Zoológica Mexicana (nueva serie) 21:1-16.	Papenfuss, T., and D. Wake. 1987. Two new species of plethodontid salamanders (genus Nototriton) from Mexico. Acta Zoológica Mexicana (nueva serie) 21:1-16.
Dendropsophus ebraccatus		Cope, E.D. 1874. Description of Some Species of Reptiles Obtained by Dr. John F. Bransford, Assistant Surgeon United States Navy, while Attached to the Nicaraguan Surveying Expedition in 1873. Proceedings of the Academy of Natural Sciences of Philadelphia 26: 64-72.
Dendropsophus microcephalus
Dendropsophus sartori		Duellman, W. E., and M. J. Fouquette, Jr. 1968. Middle American frogs of the Hyla microcephala group. University of Kansas Publications. Museum of Natural History 17: 519–557.
Dendrotriton megarhinus		Rabb, G. B. 1960. A New Salamander of the Genus Chiropterotriton from Chiapas, Mexico, with Notes on Related Species. Copeia 1960:304-311
Dendrotriton xolocalcae	Taylor, E. H. 1941. New amphibians from the Hobart M. Smith Mexican collections. The University of Kansas Science bulletin. 27:141-167.	Taylor, E. H. 1941. New amphibians from the Hobart M. Smith Mexican collections. The University of Kansas Science bulletin. 27:141-167.
Dermophis mexicanus
Dermophis oaxacae
Diaglena spatulata
Duellmanohyla ignicolor		Duellman, W.E. 1961. Descriptions of Two Species of Frogs, Genus Ptychohyla. Studies. University of Kansas Publications. Museum of Natural History 13: 349–357
Ecnomiohyla echinata		Duellman, W. E. 1961. A new species of fringe-limbed tree frog from Mexico. Studies of American hylid frogs. VIII. Transactions of the Kansas Academy of Science 64: 349–352
Ecnomiohyla miotympanum		Kellogg, R. 1932. Mexican tailless amphibians in the United States National Museum. Bulletin of the United States National Museum 160:1-224.
Ecnomiohyla valancifer
Eleutherodactylus angustidigitorum		Dixon, J. R. 1957. Geographic variation and distribution of the genus Tomodactylus in Mexico. Texas Journal of Science 9: 379–409	Dixon, J. R. 1957. Geographic variation and distribution of the genus Tomodactylus in Mexico. Texas Journal of Science 9: 379–409	Dixon, J. R. 1957. Geographic variation and distribution of the genus Tomodactylus in Mexico. Texas Journal of Science 9: 379–409
Eleutherodactylus cystignathoides		Lynch, J. D. 1970. A taxonomic revision of the leptodactylid frog genus Syrrhophus Cope. University of Kansas Publications. Museum of Natural History 20:1-45.
Eleutherodactylus dennisi		Lynch, J. D. 1970. A taxonomic revision of the leptodactylid frog genus Syrrhophus Cope. University of Kansas Publications. Museum of Natural History 20:1-45.
Eleutherodactylus dilatus		Davis, W. B., and J. R. Dixon. 1955. Notes on Mexican toads of the genus Tomodactylus with the descriptions of two new species. Herpetologica 11: 154–160
Eleutherodactylus dixoni /Eleuthrodactylus albolabris		Dixon, J. R. 1957. Geographic variation and distribution of the genus Tomodactylus in Mexico. Texas Journal of Science 9: 379–409
Eleutherodactylus grandis		Dixon, J. R. 1957. Geographic variation and distribution of the genus Tomodactylus in Mexico. Texas Journal of Science 9: 379–409
Eleutherodactylus guttilatus		Lynch, J. D. 1970. A taxonomic revision of the leptodactylid frog genus Syrrhophus Cope. University of Kansas Publications. Museum of Natural History 20:1-45.
Eleutherodactylus interorbitalis		Lynch, J. D. 1970. A taxonomic revision of the leptodactylid frog genus Syrrhophus Cope. University of Kansas Publications. Museum of Natural History 20:1-45.
Eleutherodactylus leprus		Lynch, J. D. 1970. A taxonomic revision of the leptodactylid frog genus Syrrhophus Cope. University of Kansas Publications. Museum of Natural History 20:1-45.
Eleutherodactylus longipes		Lynch, J. D. 1970. A taxonomic revision of the leptodactylid frog genus Syrrhophus Cope. University of Kansas Publications. Museum of Natural History 20:1-45.
Eleutherodactylus marnockii		Lynch, J. D. 1970. A taxonomic revision of the leptodactylid frog genus Syrrhophus Cope. University of Kansas Publications. Museum of Natural History 20:1-45.
Eleutherodactylus maurus		Dixon, J. R. 1957. Geographic variation and distribution of the genus Tomodactylus in Mexico. Texas Journal of Science 9: 379–409		Dixon, J. R. 1957. Geographic variation and distribution of the genus Tomodactylus in Mexico. Texas Journal of Science 9: 379–409
Eleutherodactylus modestus		Lynch, J. D. 1970. A taxonomic revision of the leptodactylid frog genus Syrrhophus Cope. University of Kansas Publications. Museum of Natural History 20:1-45.
Eleutherodactylus nitidus		Davis, W. B., and J. R. Dixon. 1955. Notes on Mexican toads of the genus Tomodactylus with the descriptions of two new species. Herpetologica 11: 154–160
Eleutherodactylus nivicolimae		Lynch, J. D. 1970. A taxonomic revision of the leptodactylid frog genus Syrrhophus Cope. University of Kansas Publications. Museum of Natural History 20:1-45.
Eleutherodactylus pallidus		Lynch, J. D. 1970. A taxonomic revision of the leptodactylid frog genus Syrrhophus Cope. University of Kansas Publications. Museum of Natural History 20:1-45.
Eleutherodactylus pipilans
Eleutherodactylus planirostris
Eleutherodactylus rubrimaculatus		Lynch, J. D. 1970. A taxonomic revision of the leptodactylid frog genus Syrrhophus Cope. University of Kansas Publications. Museum of Natural History 20:1-45.
Eleutherodactylus rufescens
Eleutherodactylus saxatilis		Webb, R. G. 1962. A new species of frog (genus Tomodactylus) from western México. University of Kansas Publications. Museum of Natural History 15: 175–181
Eleutherodactylus syristes
Eleutherodactylus teretistes		Lynch, J. D. 1970. A taxonomic revision of the leptodactylid frog genus Syrrhophus Cope. University of Kansas Publications. Museum of Natural History 20:1-45.
Eleutherodactylus verrucipes		Lynch, J. D. 1970. A taxonomic revision of the leptodactylid frog genus Syrrhophus Cope. University of Kansas Publications. Museum of Natural History 20:1-45.
Eleutherodactylus verruculatus		Kellogg, R. 1932. Mexican tailless amphibians in the United States National Museum. Bulletin of the United States National Museum 160:1-224.
Ensatina eschscholtzii
Exerodonta abdivita		Campbell, J. A., and W. E. Duellman. 2000. New species of stream-breeding hylid frogs from the northern versant of the highlands of Oaxaca, Mexico. Scientific Papers. Natural History Museum, University of Kansas 16: 1–28
Exerodonta chimalapa		Mendelson, J. R., III, and J. A. Campbell. 1994. Two new species of the Hyla sumichrasti group (Amphibia: Anura: Hylidae). Proceedings of the Biological Society of Washington 107: 398–409
Exerodonta sumichrasti		Mendelson, J. R., III, and J. A. Campbell. 1994. Two new species of the Hyla sumichrasti group (Amphibia: Anura: Hylidae). Proceedings of the Biological Society of Washington 107: 398–409
Exerodonta xera		Mendelson, J. R., III, and J. A. Campbell. 1994. Two new species of the Hyla sumichrasti group (Amphibia: Anura: Hylidae). Proceedings of the Biological Society of Washington 107: 398–409
Gastrophryne elegans
Hyla eximia		amphibia web: http://amphibiaweb.org/
Hyla wrightorum		Taylor, E. H. 1939 "1938". Frogs of the Hyla eximia group in Mexico, with descriptions of two new species. University of Kansas Science Bulletin 25: 421–445	Lemos Espinal, J.A. 2007 Anfibios y reptiles del estado de Sonora. Universidad Nacional Autónoma de México. Informe final SNIB-CONABIO proyecto No. CE001 México D.F.
Hyalinobatrachium fleischmanni		Taylor, E. H. 1942. New Tailless Amphibia from Mexico. The University of Kansas Science Bulletin. 28:67-89.
Hypopachus variolosus
Incilius alvarius
Incilius cavifrons
Incilius cristatus		Kellogg, R. 1932. Mexican tailless amphibians in the United States National Museum. Bulletin of the United States National Museum 160:1-224.
Incilius gemmifer
Incilius luetkeniin
Incilius perplexus		Taylor, E. H. 1943. Herpetological novelties from Mexico. University of Kansas Science Bulletin 29: 343–361
Incilius tutelarius
Incilius vacilleps		Kellogg, R. 1932. Mexican tailless amphibians in the United States National Museum. Bulletin of the United States National Museum 160:1-224.	Kellogg, R. 1932. Mexican tailless amphibians in the United States National Museum. Bulletin of the United States National Museum 160:1-224.
Leptodactylus fragilis		Kellogg, R. 1932. Mexican tailless amphibians in the United States National Museum. Bulletin of the United States National Museum 160: 1–224		amphibia web: http://amphibiaweb.org/
Leptodactylus melanonotus		Taylor, E.H. 1936. New Species of Amphibia from Mexico. Trasactions of the Kansas Academy of Sciences. 39:349-363; Kellogg, R. 1932. Mexican tailless amphibians in the United States National Museum. Bulletin of the United States National Museum 160:1-224.	Kellogg, R. 1932. Mexican tailless amphibians in the United States National Museum. Bulletin of the United States National Museum 160:1-224.
Lithobates berlandieri
Lithobates catesbeianus
Lithobates chiricahuensis
Lithobates lemosespinali
Lithobates omiltemanus		Günther, A. C. 1900. Reptilia and Batrachia. Pages 197-212 in O. Salvin, and F. D. Godman, editors. Biologia Centrali Americana. R. H. Porter and Dulau & Co., Londres
Lithobates tarahumarae
Lithobates vaillanti
Lithobates yavapaiensis
Notophthalmus meridionalis
Nyctanolis pernix
Oedipina elongata		Brodie, E. D., M. Acevedo, and J. A. Campbell. 2012. New Salamanders of the Genus Oedipina (Caudata: Plethodontidae) from Guatemala. Journal of Herpetology 46:233-240
Parvimolge townsendi	Dunn, E. R. 1922. A new salamander from Mexico. Proceedings of the Biological Society of Washington 35:5-6	Dunn, E. R. 1922. A new salamander from Mexico. Proceedings of the Biological Society of Washington 35:5-6
Plectrohyla arborescandens		Campbell, J. A., and W. E. Duellman. 2000. New Species of Stream-breeding Hylid Frogs from the Northern Versant of the Highlands of Oaxaca, Mexico. Scientific Papers, Natural History Museum, The University of Kansas 16:1-28
Plectrohyla bistincta
Plectrohyla calvicollina
Plectrohyla cyclada		Campbell, J. A., and W. E. Duellman. 2000. New Species of Stream-breeding Hylid Frogs from the Northern Versant of the Highlands of Oaxaca, Mexico. Scientific Papers, Natural History Museum, The University of Kansas 16:1-28
Plectrohyla guatemalensis		Bumzahem, C. B., and H. M. Smith. 1954. Additional Records and Descriptions of Mexican Frogs of the Genus Plectrohyla. Herpetologica 10:61-66.
Plectrohyla hazelae
Plectrohyla lacertosa		Duellman, W. E., and J. A. Campbell 1992. Hylid frogs of the genus Plectrohyla: systematics and phylogenetic relationships. University of Michigan, Museum of Zoology, Ann Arbor, Michigan
Plectrohyla matudai		Hartweg, N. 1941. Notes on the genus Plectrohyla, with descriptions of new species. Occasional Papers of the Museum of Zoology, University of Michigan 437: 2-10.
Plectrohyla mykter
Plectrohyla pentheter		Adler, K. 1965. Three new frogs of the genus Hyla from The Sierra Madre del Sur of Mexico. Occasional Papers of the Museum of Zoology, University of Michigan 642:1-19.	Adler, K. 1965. Three new frogs of the genus Hyla from The Sierra Madre del Sur of Mexico. Occasional Papers of the Museum of Zoology, University of Michigan 642:1-19.
Plectrohyla psarosema
Plectrohyla pycnochila		Duellman, W. E., and J. A. Campbell 1992. Hylid frogs of the genus Plectrohyla: systematics and phylogenetic relationships. University of Michigan, Museum of Zoology, Ann Arbor, Michigan
Plectrohyla sabrina		Caldwell, J. P. 1974. A re-evaluation of the Hyla bistincta species group, with descriptions of three new species (Anura: Hylidae). Occasional Papers of the Museum of Natural History, University of Kansas 28:1-37
Plectrohyla sagorum
Plectrohyla thorectes		Adler, K. 1965. Three new frogs of the genus Hyla from The Sierra Madre del Sur of Mexico. Occasional Papers of the Museum of Zoology, University of Michigan 642:1-19.	Adler, K. 1965. Three new frogs of the genus Hyla from The Sierra Madre del Sur of Mexico. Occasional Papers of the Museum of Zoology, University of Michigan 642:1-19.
Pseudacris cadaverina
Pseudacris clarkii		amphibia web: http://amphibiaweb.org/		amphibia web: http://amphibiaweb.org/
Pseudacris regilla		amphibia web: http://amphibiaweb.org/		amphibia web: http://amphibiaweb.org/
Pseudoeurycea ahuitzotl		Adler, K. 1996. The salamanders of Guerrero, Mexico, with descriptions of five new species of Pseudoeurycea (Caudata: Plethodontidae). Occasional papers of the Natural History Museum , University of Kansas 177: 1-28.
Pseudoeurycea altamontana		Taylor, E. H. 1939. Concerning Mexican salamanders. University of Kansas Science Bulletin 25:259-313.
Pseudoeurycea amuzga		Pérez-Ramos, E., Saldaña-de-la-Riva, L. 2003. Nueva especie de salamandra del género Pseudoeurycea (Amphibia:Caudata:Plethodontidae) de la región Amuzga, al sureste de Guerrero, México). Acta Zoológica Mexicana (nueva serie) 89: 55-68
Pseudoeurycea anitae		Bogert, C. M. 1967. New salamanders of the plethodontid genus Pseudoeurycea from the Sierra Madre del Sur of Mexico. American Museum Novitates 2314:1-27
Pseudoeurycea aquatica		Wake, D.B., J.A. Campbell. 2001. An aquatic plethodontid salamander from Oaxaca, Mexico. Herpetologica. 57(4): 509-514
Pseudoeurycea aurantia		Canseco-Márquez, L., G. Parra-Olea. 2003. A new species of Pseudoeurycea (Caudata: Plethodontidae) from northern Oaxaca, México. Herpetological Journal 13: 21-26.
Pseudoeurycea bellii			amphibia web: http://amphibiaweb.org/	amphibia web: http://amphibiaweb.org/
Pseudoeurycea boneti
Pseudoeurycea brunnata	Bumzahem, C. B., and H. M. Smith. 1955. Additional Notes and Descriptions of Plethodontid Salamanders from Mexico. Herpetologica 11:73-75	Bumzahem, C. B., and H. M. Smith. 1955. Additional Notes and Descriptions of Plethodontid Salamanders from Mexico. Herpetologica 11:73-75
Pseudoeurycea cephalica		amphibia web: http://amphibiaweb.org/
Pseudoeurycea cochranae	Taylor, E. H. 1943. Herpetological novelties from Mexico. University of Kansas Science Bulletin 29	Taylor, E. H. 1943. Herpetological novelties from Mexico. University of Kansas Science Bulletin 29
Pseudoeurycea conanti		Bogert, C. M. 1967. New salamanders of the plethodontid genus Pseudoeurycea from the Sierra Madre del Sur of Mexico. American Museum Novitates 2314:1-27
Pseudoeurycea firscheini		Shannon, F. A., and J. E. Werler. 1955. Report on a Small Collection of Amphibians from Veracruz, with a Description of a New Species of Pseudoeurycea. Herpetologica 11:81-85
Pseudoeurycea gadovii	Dunn, E. R. 1926. The Salamanders of the Family Plethodontidae. Smith College, Northampton, Massachusetts	Dunn, E. R. 1926. The Salamanders of the Family Plethodontidae. Smith College, Northampton, Massachusetts	Dunn, E. R. 1926. The Salamanders of the Family Plethodontidae. Smith College, Northampton, Massachusetts
Pseudoeurycea galeanae		amphibia web: http://amphibiaweb.org/
Pseudoeurycea gigantea
Pseudoeurycea goebeli	Schmidt, K. P. 1936. Guatemalan salamanders of the genus Oedipus. Zoological Series of Field Museum of Natural History 20:135-166		Schmidt, K. P. 1936. Guatemalan salamanders of the genus Oedipus. Zoological Series of Field Museum of Natural History 20:135-166
Pseudoeurycea juarezi		Regal, P. J., and G. V. Elliott. 1966. A new plethodontid salamander from Oaxaca, Mexico. American Museum novitates 2266:1-8.
Pseudoeurycea leprosa		Cope, E.D. 1869. A review of the species of Plethodontidae and Desmognathidae. Proceedings of the Academy of Natural Sciences of Philadelphia 21: 93-118; amphibia web: http://amphibiaweb.org/
Pseudoeurycea lineola	amphibia web: http://amphibiaweb.org/	amphibia web: http://amphibiaweb.org/
Pseudoeurycea longicauda		Lynch, J.F., D.B. Wake, S.Y. Yang. 1983. Genic and Morphological differentiation in Mexican Pseuoeurycea (Caudata: Plethodontidae), with a Description of a New Species. Copeia 1983(4): 884-894.
Pseudoeurycea lynchi
Pseudoeurycea maxima		Parra-Olea, G., M. García-París, T.J. Papenfuss, D.B. Wake. Systematics of the Pseudoeurycea bellii (Caudata: Plethodontidae) Species Complex. Herpetologica 61(2): 145-158.
Pseudoeurycea melanomolga
Pseudoeurycea mixcoatl		Adler, K. 1996. The salamanders of Guerrero, Mexico, with descriptions of five new species of Pseudoeurycea (Caudata: Plethodontidae). Occasional papers of the Natural History Museum , University of Kansas 177: 1-28.
Pseudoeurycea mixteca
Pseudoeurycea mystax		Bogert, C. M. 1967. New salamanders of the plethodontid genus Pseudoeurycea from the Sierra Madre del Sur of Mexico. American Museum Novitates 2314:1-27
Pseudoeurycea naucampatepetl
Pseudoeurycea nigra		amphibia web: http://amphibiaweb.org/
Pseudoeurycea nigromaculata		Taylor, E. H. 1941. New amphibians from the Hobart M. Smith Mexican collections. The University of Kansas Science bulletin. 27:141-167.
Pseudoeurycea obesa		Parra-Olea, G., García-París, M., Hanken, M., D.B. Wake. 2005. Two new species of Pseudoeurycea (Caudata: Plethodontidae) from the Mountains of Northern Oaxaca, Mexico. Copeia 2005(3): 461-469.
Pseudoeurycea orchileucos		Brodie, E.D., J.R. Mendelson III, J.A. Campbell. 2002. Taxonomic Revision of the Mexican Plethodontid salamanders of the genus Lineatriton, with the descripction of two new species. Herpetologica 58(2): 194-204.	Brodie, E.D., J.R. Mendelson III, J.A. Campbell. 2002. Taxonomic Revision of the Mexican Plethodontid salamanders of the genus Lineatriton, with the descripction of two new species. Herpetologica 58(2): 194-204.
Pseudoeurycea orchimelas		Brodie, E.D., J.R. Mendelson III, J.A. Campbell. 2002. Taxonomic Revision of the Mexican Plethodontid salamanders of the genus Lineatriton, with the descripction of two new species. Herpetologica 58(2): 194-204.	Brodie, E.D., J.R. Mendelson III, J.A. Campbell. 2002. Taxonomic Revision of the Mexican Plethodontid salamanders of the genus Lineatriton, with the descripction of two new species. Herpetologica 58(2): 194-204.
Pseudoeurycea papenfussi		Parra-Olea, G., García-París, M., Hanken, M., D.B. Wake. 2005. Two new species of Pseudoeurycea (Caudata: Plethodontidae) from the Mountains of Northern Oaxaca, Mexico. Copeia 2005(3): 461-469.
Pseudoeurycea parva
Pseudoeurycea praecellens		Raab, G.B. 1955. A new salamander of the genus Parvimolge from Mexico. Breviora. Museum of Comparative Zoology, Cambridge, Massachusetts 42: 1-9.
Pseudoeurycea quetzalanensis		Parra-Olea, G., L. Canseco-Márquez, M. García-París. 2004. A morphologically distinct new species of Pseudoeurycea (Caudata: Pltehodontidae) from the Sierra Madre Oriental of Puebla. México. Herpetologica 60(4):78-84.
Pseudoeurycea rex	Dunn, E. R. 1921. Two new Central American salamanders. Proceedings of the Biological Society of Washington 34:143-145	Dunn, E. R. 1921. Two new Central American salamanders. Proceedings of the Biological Society of Washington 34:143-145
Craugastor hobartsmithi
Pseudoeurycea saltator		Lynch, J. F., and D. Wake. 1989. Two new species of Pseudoeurycea (Amphibia: Caudata) from Oaxaca, Mexico. Contributions in Science. Natural History Museum of Los Angeles County 411:11-22
Pseudoeurycea scandens		Walker, C.F. 1955. A new salamander of the genus Pseudoeurycea from Tamaulipas. Occasional papers of the Museum of Zoology. University of Michigan 567: 1 - 9	Walker, C.F. 1955. A new salamander of the genus Pseudoeurycea from Tamaulipas. Occasional papers of the Museum of Zoology. University of Michigan 567: 1 - 9	Walker, C.F. 1955. A new salamander of the genus Pseudoeurycea from Tamaulipas. Occasional papers of the Museum of Zoology. University of Michigan 567: 1 - 9
Pseudoeurycea smithi		Taylor, E. H. 1938. Concerning Mexican salamanders. University of Kansas Science Bulletin 25:259-313
Pseudoeurycea tenchalli		Adler, K. 1996. The salamanders of Guerrero, Mexico, with descriptions of five new species of Pseudoeurycea (Caudata: Plethodontidae). Occasional papers of the Natural History Museum , University of Kansas 177: 1-28.
Pseudoeurycea teotepec		Adler, K. 1996. The salamanders of Guerrero, Mexico, with descriptions of five new species of Pseudoeurycea (Caudata: Plethodontidae). Occasional papers of the Natural History Museum , University of Kansas 177: 1-28.
Pseudoeurycea tlahcuiloh		Adler, K. 1996. The salamanders of Guerrero, Mexico, with descriptions of five new species of Pseudoeurycea (Caudata: Plethodontidae). Occasional papers of the Natural History Museum , University of Kansas 177: 1-28.
Pseudoeurycea tlilicxitl
Pseudoeurycea unguidentis		Taylor, E. H. 1941. New Plethodont Salamanders from Mexico. Herpetologica 2:57-65
Pseudoeurycea werleri		Darling, D. M., and H. M. Smith. 1954. A Collection of Reptiles and Amphibians from Eastern Mexico. Transactions of the Kansas Academy of Science (1903-) 57:180-195
Ptychohyla acrochorda		Campbell, J. A., and W. E. Duellman. 2000. New Species of Stream-breeding Hylid Frogs from the Northern Versant of the Highlands of Oaxaca, Mexico. Scientific Papers, Natural History Museum, The University of Kansas 16:1-28	Campbell, J. A., and W. E. Duellman. 2000. New Species of Stream-breeding Hylid Frogs from the Northern Versant of the Highlands of Oaxaca, Mexico. Scientific Papers, Natural History Museum, The University of Kansas 16:1-28	Campbell, J. A., and W. E. Duellman. 2000. New Species of Stream-breeding Hylid Frogs from the Northern Versant of the Highlands of Oaxaca, Mexico. Scientific Papers, Natural History Museum, The University of Kansas 16:1-28
Ptychohyla euthysanota		Taylor, E. H. 1942. New Tailless Amphibia from Mexico. The University of Kansas Science Bulletin. 28:67-89.
Ptychohyla zophodes		Campbell, J. A., and W. E. Duellman. 2000. New Species of Stream-breeding Hylid Frogs from the Northern Versant of the Highlands of Oaxaca, Mexico. Scientific Papers, Natural History Museum, The University of Kansas 16:1-28	Campbell, J. A., and W. E. Duellman. 2000. New Species of Stream-breeding Hylid Frogs from the Northern Versant of the Highlands of Oaxaca, Mexico. Scientific Papers, Natural History Museum, The University of Kansas 16:1-28	Campbell, J. A., and W. E. Duellman. 2000. New Species of Stream-breeding Hylid Frogs from the Northern Versant of the Highlands of Oaxaca, Mexico. Scientific Papers, Natural History Museum, The University of Kansas 16:1-28
Rana boylii		Nussbaum, R. A., E. D. J. Brodie, and R. M. Storm 1983. Amphibians and reptiles of the Pacific Northwest. University Press Of Idaho, EUA
Rana draytonii			amphibia web: http://amphibiaweb.org/	amphibia web: http://amphibiaweb.org/
Rhinella marina		Kellogg, R. 1932. Mexican tailless amphibians in the United States National Museum. Bulletin of the United States National Museum 160:1-224.	Lemos Espinal, J.A. 2007 Anfibios y reptiles del estado de Sonora. Universidad Nacional Autónoma de México. Informe final SNIB-CONABIO proyecto No. CE001 México D.F.
Rhinophrynus dorsalis			Kellogg, R. 1932. Mexican tailless amphibians in the United States National Museum. Bulletin of the United States National Museum 160:1-224.
Scaphiopus couchii		Kellogg, R. 1932. Mexican tailless amphibians in the United States National Museum. Bulletin of the United States National Museum 160:1-224.	Kellogg, R. 1932. Mexican tailless amphibians in the United States National Museum. Bulletin of the United States National Museum 160:1-224.
Scaphiopus hurteri		Strecker, J.K. 1910. Description of a new solitary spadefoot (Scaphiopus hurterii) from texas, with other herpetological novelties. Proceedings of the Biological Society of Washington 23: 115-122
Siren intermedia			amphibia web: http://amphibiaweb.org/	amphibia web: http://amphibiaweb.org/
Siren intermedia intermedia
Siren intermedia nettingi
Siren intermedia texana
Siren lacertina
Smilisca baudinii			Lemos Espinal, J.A. 2007 Anfibios y reptiles del estado de Sonora. Universidad Nacional Autónoma de México. Informe final SNIB-CONABIO proyecto No. CE001 México D.F.
Smilisca fodiens
Spea bombifrons
Spea hammondii		amphibia web: http://amphibiaweb.org/	amphibia web: http://amphibiaweb.org/	amphibia web: http://amphibiaweb.org/
Spea multiplicata			Kellogg, R. 1932. Mexican tailless amphibians in the United States National Museum. Bulletin of the United States National Museum 160:1-224; amphibia web: http://amphibiaweb.org/	Kellogg, R. 1932. Mexican tailless amphibians in the United States National Museum. Bulletin of the United States National Museum 160:1-224; amphibia web: http://amphibiaweb.org/
Thorius arboreus
Thorius aureus
Thorius boreas		Hanken, J., and D. B. Wake. 1994. Five new species of minute salamanders, genus Thorius (Caudata: Plethodontidae), from northern Oaxaca, Mexico. Copeia 1994: 573–590.
Thorius dubitus		Taylor, E. H. 1941. Herpetological miscellany, no. II. University of Kansas Science Bulletin 27:105-139
Thorius grandis		Hanken, J., D. B. Wake, and H. L. Freeman. 1999. Three new species of minute salamanders (Thorius: Plethodontidae) from Guerrero, Mexico, including the report of a novel dental polymorphism in urodeles. Copeia 1999: 917–931.
Thorius insperatus
Thorius lunaris
Thorius macdougalli		Hanken, J., and D. B. Wake. 1994. Five new species of minute salamanders, genus Thorius (Caudata: Plethodontidae), from northern Oaxaca, Mexico. Copeia 1994: 573–590.
Thorius magnipes
Thorius minutissimus	Taylor, E. H. 1949. New or unusual Mexican amphibians. American Museum Novitates 1437:1-21	Taylor, E. H. 1949. New or unusual Mexican amphibians. American Museum Novitates 1437:1-21
Thorius minydemus
Thorius munificus
Thorius narismagnus
Thorius narisovalis		Taylor, E. H. 1939. New salamanders from Mexico, with a discussion of certain known forms. University of Kansas Science Bulletin 26:407-431
Thorius omiltemi		Hanken, J., D. B. Wake, and H. L. Freeman. 1999. Three new species of minute salamanders (Thorius: Plethodontidae) from Guerrero, Mexico, including the report of a novel dental polymorphism in urodeles. Copeia 1999: 917–931.
Thorius papaloae
Thorius pennatulus
Thorius pulmonaris	Taylor, E. H. 1939. New salamanders from Mexico, with a discussion of certain known forms. University of Kansas Science Bulletin 26:407-431	Taylor, E. H. 1939. New salamanders from Mexico, with a discussion of certain known forms. University of Kansas Science Bulletin 26:407-431
Thorius schmidti		Gehlbach, F. R. 1959. New Plethodontid Salamanders of the Genus Thorius from Puebla, Mexico. Copeia 1959:203-206
Thorius smithi		Hanken, J., and D. B. Wake. 1994. Five new species of minute salamanders, genus Thorius (Caudata: Plethodontidae), from northern Oaxaca, Mexico. Copeia 1994: 573–590.
Thorius spilogaster
Thorius troglodytes
Tlalocohyla godmani
Tlalocohyla loquax
Trachycephalus venulosus
Triprion petasatus
Ambystoma bombypellum	Taylor, E. H. 1939. New salamanders from Mexico, with a discussion of certain known forms. University of Kansas Science Bulletin 26:407-431.	Taylor, E. H. 1939. New salamanders from Mexico, with a discussion of certain known forms. University of Kansas Science Bulletin 26:407-431.
Ambystoma rosaceum	Anderson, J.D. 1961. The life history and systematics of Ambystoma rosaceum. Copeia 1961: 371-377 (amphibia web: http://amphibiaweb.org/)	Anderson, J.D. 1961. The life history and systematics of Ambystoma rosaceum. Copeia 1961: 371-377 (amphibia web: http://amphibiaweb.org/)	Lemos Espinal, J.A. 2007 Anfibios y reptiles del estado de Sonora. Universidad Nacional Autónoma de México. Informe final SNIB-CONABIO proyecto No. CE001 México D.F.; amphibia web: http://amphibiaweb.org/
Anaxyrus compactilis		Kellogg, R. 1932. Mexican tailless amphibians in the United States National Museum. Bulletin of the United States National Museum 160:1-224.
Anaxyrus debilis		Kellogg, R. 1932. Mexican tailless amphibians in the United States National Museum. Bulletin of the United States National Museum 160:1-224.	Kellogg, R. 1932. Mexican tailless amphibians in the United States National Museum. Bulletin of the United States National Museum 160:1-224.
Charadrahyla trux		Adler, K., and D. M. Dennis. 1972. New tree frogs of the genus Hyla from the cloud forests of western Guerrero, Mexico. Occasional Papers of the Museum of Natural History, the University of Kansas ; no. 7
Duellmanohyla chamulae		Duellman, W.E. 1961. Descriptions of Two Species of Frogs, Genus Ptychohyla. Studies. University of Kansas Publications. Museum of Natural History 13: 349–357
Engystomops pustulosus		Kellogg, R. 1932. Mexican tailless amphibians in the United States National Museum. Bulletin of the United States National Museum 160:1-224.	Kellogg, R. 1932. Mexican tailless amphibians in the United States National Museum. Bulletin of the United States National Museum 160:1-224.
Exerodonta bivocata		Campbell, J. A., and W. E. Duellman. 2000. New species of stream-breeding hylid frogs from the northern versant of the highlands of Oaxaca, Mexico. Scientific Papers. Natural History Museum, University of Kansas 16: 1–28
Exerodonta juanitae		Snyder, D. H. 1972. Hyla juanitae, a New Treefrog from Southern México, and Its Relationship to H. pinorum. Journal of Herpetology 6:5-15	Snyder, D. H. 1972. Hyla juanitae, a New Treefrog from Southern México, and Its Relationship to H. pinorum. Journal of Herpetology 6:5-15
Exerodonta melanomma		Campbell, J. A., and W. E. Duellman. 2000. New Species of Stream-breeding Hylid Frogs from the Northern Versant of the Highlands of Oaxaca, Mexico. Scientific Papers, Natural History Museum, The University of Kansas 16:1-28
Exerodonta smaragdina		Mendelson, J. R., III, and J. A. Campbell. 1994. Two new species of the Hyla sumichrasti group (Amphibia: Anura: Hylidae). Proceedings of the Biological Society of Washington 107: 398–409
Gastrophryne olivacea			Lemos Espinal, J.A. 2007 Anfibios y reptiles del estado de Sonora. Universidad Nacional Autónoma de México. Informe final SNIB-CONABIO proyecto No. CE001 México D.F.
Hyla arenicolor			Lemos Espinal, J.A. 2007 Anfibios y reptiles del estado de Sonora. Universidad Nacional Autónoma de México. Informe final SNIB-CONABIO proyecto No. CE001 México D.F.
Hyla euphorbiacea		Taylor, E. H. 1939 "1938". Frogs of the Hyla eximia group in Mexico, with descriptions of two new species. University of Kansas Science Bulletin 25: 421–445
Hyla plicata		Taylor, E.H. 1938. Frogs of the Hyla eximia group in Mexico, with descriptions of two new species. University of kansas Science Bulletin 25: 421-445.
Incilius canaliferus		Kellogg, R. 1932. Mexican tailless amphibians in the United States National Museum. Bulletin of the United States National Museum 160:1-224.
Incilius coccifer		Kellogg, R. 1932. Mexican tailless amphibians in the United States National Museum. Bulletin of the United States National Museum 160:1-224.
Incilius mazatlanensis		Taylor, E. H. 1943. Herpetological novelties from Mexico. University of Kansas Science Bulletin 29: 343–361	Lemos Espinal, J.A. 2007 Anfibios y reptiles del estado de Sonora. Universidad Nacional Autónoma de México. Informe final SNIB-CONABIO proyecto No. CE001 México D.F.
Lithobates dunni		Zweifel, R. G. 1957. A New Frog of the Genus Rana from Michoacán, Mexico. Copeia 1957:78-83
Lithobates forreri		Savage, J. M. 2002. The Amphibians and Reptiles of Costa Rica: A herpetofauna between Two Continents, between Two Seas. The University of Chicago Press, China	Lemos Espinal, J.A. 2007 Anfibios y reptiles del estado de Sonora. Universidad Nacional Autónoma de México. Informe final SNIB-CONABIO proyecto No. CE001 México D.F.
Lithobates megapoda		Webb, R. G. 1996. A Systematic Review of the Mexican Frog Rana megapoda Taylor (Anura: Ranidae). The Southwestern Naturalist 41:35-42	Webb, R. G. 1996. A Systematic Review of the Mexican Frog Rana megapoda Taylor (Anura: Ranidae). The Southwestern Naturalist 41:35-42
Lithobates pustulosus		Kellogg, R. 1932. Mexican tailless amphibians in the United States National Museum. Bulletin of the United States National Museum 160:1-224.
Lithobates sierramadrensis		Taylor, E. H. 1938. New species of Mexican tailless Amphibia. University of Kansas Science Bulletin 25:385-405
Lithobates tlaloci		Hillis, D. M., and J. S. Frost. 1985. Three new species of leopard frogs (Rana pipiens complex) from the Mexican Plateau. Occasional Papers of the Museum of Natural History University of Kansas 117:1-14.
Megastomatohyla mixomaculata		Taylor, E. H. 1950. A New Bromeliad Frog from the Mexican State of Veracruz. Copeia 1950:274-276
Pachymedusa dacnicolor			Lemos Espinal, J.A. 2007 Anfibios y reptiles del estado de Sonora. Universidad Nacional Autónoma de México. Informe final SNIB-CONABIO proyecto No. CE001 México D.F.
Plectrohyla avia		Duellman, W. E., and J. A. Campbell 1992. Hylid frogs of the genus Plectrohyla: systematics and phylogenetic relationships. University of Michigan, Museum of Zoology, Ann Arbor, Michigan	Duellman, W. E., and J. A. Campbell 1992. Hylid frogs of the genus Plectrohyla: systematics and phylogenetic relationships. University of Michigan, Museum of Zoology, Ann Arbor, Michigan
Plectrohyla cyanomma		Caldwell, J. P. 1974. A re-evaluation of the Hyla bistincta species group, with descriptions of three new species (Anura: Hylidae). Occasional Papers of the Museum of Natural History, University of Kansas 28:1-37	Caldwell, J. P. 1974. A re-evaluation of the Hyla bistincta species group, with descriptions of three new species (Anura: Hylidae). Occasional Papers of the Museum of Natural History, University of Kansas 28:1-37
Plectrohyla pachyderma		Campbell, J. A., and W. E. Duellman. 2000. New species of stream-breeding hylid frogs from the northern versant of the highlands of Oaxaca, Mexico. Scientific Papers. Natural History Museum, University of Kansas 16: 1–28
Plectrohyla siopela		Caldwell, J. P. 1974. A re-evaluation of the Hyla bistincta species group, with descriptions of three new species (Anura: Hylidae). Occasional Papers of the Museum of Natural History, University of Kansas 28:1-37	Caldwell, J. P. 1974. A re-evaluation of the Hyla bistincta species group, with descriptions of three new species (Anura: Hylidae). Occasional Papers of the Museum of Natural History, University of Kansas 28:1-37
Ptychohyla leonhardschultzei		Duellman, W. E. 1960. Synonymy, Variation, and Distribution of Ptychohyla leonhard-schultzei Ahl. Studies of American Hylid Frogs. IV. Herpetologica 16:191-197	Duellman, W. E. 1960. Synonymy, Variation, and Distribution of Ptychohyla leonhard-schultzei Ahl. Studies of American Hylid Frogs. IV. Herpetologica 16:191-197
Thorius infernalis		Hanken, J., D. B. Wake, and H. L. Freeman. 1999. Three new species of minute salamanders (Thorius: Plethodontidae) from Guerrero, Mexico, including the report of a novel dental polymorphism in urodeles. Copeia 1999: 917–931.
Tlalocohyla smithii		Taylor, E.H. 1936. New Species of Amphibia from Mexico. Trasactions of the Kansas Academy of Sciences. 39:349-363	Lemos Espinal, J.A. 2007 Anfibios y reptiles del estado de Sonora. Universidad Nacional Autónoma de México. Informe final SNIB-CONABIO proyecto No. CE001 México D.F.
